# Supplementary material for: Evaluation of implementation of ministry of health's planning approach for health care providers and Behvarzes in Healthcare centers and Healthposts in Zahedan
Source: Research Square preprint supplement (doi:10.21203/rs.3.rs-8298265/v1), 2026-02-18
Supplement: Supplementary file 1 [file df1e09b63e4ca620f0cd04b3.pdf]

**Please answer the following questions to help our research work.**

**Please complete the following details.**

**Age:**      **Gender:** Female ☐      Male ☐      **Name of Health Center:**

**Education level:**

Elementary school ☐ middle school ☐ high school ☐ University ☐

**Marital status:** Single ☐ Married ☐

**Job Title:** Behvarz ☐ Healthcare Provider ☐

**Work experience:** ..... years

**Please answer the following questions.**

| Awareness assessment questions |                                                                                     |                                                                                          |                                                                                                          |                                                                                                   |               |
|--------------------------------|-------------------------------------------------------------------------------------|------------------------------------------------------------------------------------------|----------------------------------------------------------------------------------------------------------|---------------------------------------------------------------------------------------------------|---------------|
| Row                            | Questions                                                                           | Options                                                                                  |                                                                                                          |                                                                                                   |               |
| 1                              | In your opinion at what age does the first deciduous tooth erupt?                   | 6 to 7 months old                                                                        | A year old                                                                                               | 2.5 years old                                                                                     | .I don't know |
| 2                              | In your opinion at what age does the first permanent tooth erupt?                   | 2.5 years old                                                                            | 6 to 7 years old                                                                                         | 9 years old                                                                                       | .I don't know |
| 3                              | In your opinion which is the first permanent tooth to erupt?                        | Upper or lower first molar                                                               | Upper or lower second anterior                                                                           | Upper of lower first premolar                                                                     | .I don't know |
| 4                              | What is the best method of brushing?                                                | Placing the toothbrush bristles perpendicular to the teeth and making a vibrating motion | Place the toothbrush at 45 degree - angle on the tooth surface and move from the gum line to the chewing | Placing the toothbrush bristles perpendicular to the teeth and moving horizontally over the teeth | .I don't know |
| 5                              | What is the first sign of early childhood caries?                                   | White spots on the surface of the teeth                                                  | Tooth discoloration caused by iron drops                                                                 | Tooth cavities begin to form                                                                      | .I don't know |
| 6                              | How much toothpaste should be applied on toothbrush for children aged 2 to 5 years? | As long as the entire length of the                                                      | As big as a pea                                                                                          | Do not use toothpaste for children                                                                | .I don't know |

|    |                                                                  |                        |                               |                          |               |
|----|------------------------------------------------------------------|------------------------|-------------------------------|--------------------------|---------------|
|    |                                                                  | toothbrush<br>bristles |                               | under5 years<br>.old     |               |
| 7  | How often should the periodical dental examination be conducted? | Every 2 years          | Every 6 months                | Every 3 years            | .I don't know |
| 8  | At what age should children start brushing?                      | 6 months old           | One year old                  | 2 years old              | .I don't know |
| 9  | What consistency and color demonstrate healthy gums?             | Soft and pink          | Stiff and pink                | Soft and red             | Stiff and red |
| 10 | At what age do you recommend the first dental check-up?          | Less than one year old | Between one and two years old | Three years old or older | .I don't know |

| Attitude assessment questions |                                                                                                              |                     |          |                    |             |                        |
|-------------------------------|--------------------------------------------------------------------------------------------------------------|---------------------|----------|--------------------|-------------|------------------------|
| Row                           | Question                                                                                                     | Options             |          |                    |             |                        |
|                               |                                                                                                              | I completely agree  | I agree  | I have no opinion  | I disagree  | I completely disagree  |
| 1                             | The bacteria that cause tooth decay are usually passed from mother to child.                                 | I completely .agree | .I agree | I have no .opinion | .I disagree | I completely .disagree |
| 2                             | The frequency of sugar consumption plays a more important role in causing cavities than the amount consumed. | I completely .agree | .I agree | I have no .opinion | .I disagree | I completely .disagree |

|    |                                                                                                                             |                     |          |                    |             |                        |
|----|-----------------------------------------------------------------------------------------------------------------------------|---------------------|----------|--------------------|-------------|------------------------|
| 3  | Dental caries in baby teeth is a predictor of caries in permanent teeth.                                                    | I completely .agree | .I agree | I have no .opinion | .I disagree | I completely .disagree |
| 4  | Maintaining a child's baby teeth is important for the proper growth of permanent teeth.                                     | I completely .agree | .I agree | I have no .opinion | .I disagree | I completely .disagree |
| 5  | Tooth decay is an infectious and communicable disease.                                                                      | I completely .agree | .I agree | I have no .opinion | .I disagree | I completely .disagree |
| 6  | The first sign of early childhood caries is white lines or spots on the surface of the teeth.                               | I completely .agree | .I agree | I have no .opinion | .I disagree | I completely .disagree |
| 7  | The first time to visit the dentist for a dental check-up is within the first six months after the first baby tooth erupts. | I completely .agree | .I agree | I have no .opinion | .I disagree | I completely .disagree |
| 8  | The mother's diet during pregnancy affects the baby's teeth.                                                                | I completely .agree | .I agree | I have no .opinion | .I disagree | I completely .disagree |
| 9  | The use of finger toothbrushes by mothers can prevent early childhood tooth decay.                                          | I completely .agree | .I agree | I have no .opinion | .I disagree | I completely .disagree |
| 10 | Fluoride treatment is one of the methods of preventing tooth decay.                                                         | I completely .agree | .I agree | I have no .opinion | .I disagree | I completely .disagree |

| Performance measurement questions |                                                                                                  |         |           |       |        |
|-----------------------------------|--------------------------------------------------------------------------------------------------|---------|-----------|-------|--------|
| Row                               | Question                                                                                         | Options |           |       |        |
| 1                                 | Do you examine the newly erupted teeth of children?                                              | Never   | Sometimes | Often | Always |
| 2                                 | Do you provide finger toothbrush to children under 2 years of age?                               | Never   | Sometimes | Often | Always |
| 3                                 | Do you talk to parents about the importance of deciduous teeth?                                  | Never   | Sometimes | Often | Always |
| 4                                 | Do you talk to the parents about the importance of using toothpastes with fluoride for children? | Never   | Sometimes | Often | Always |
| 5                                 | Do you talk about the breast feeding and bottle feeding problems with the mothers?               | Never   | Sometimes | Often | Always |
| 6                                 | Do you talk about the importance of regular dental check-up with patients?                       | Never   | Sometimes | Often | Always |
| 7                                 | Do you provide information regarding the oral hygiene to pregnant women?                         | Never   | Sometimes | Often | Always |
| 8                                 | Do you provide necessary training to patients on how to brush their teeth properly?              | Never   | Sometimes | Often | Always |
| 9                                 | Do you check the patients' eating habits?                                                        | Never   | Sometimes | Often | Always |
| 10                                | Do you provide fluoride varnish therapy for children ages 3 to 14 years?                         | Never   | Sometimes | Often | Always |
